# Supplementary material for: Elucidating gas–surface interactions relevant to atmospheric particle growth using combined temperature programmed desorption and temperature-dependent uptake
Source: Royal Society of Chemistry journal article supplement (doi:10.1039/d4cp02528h), 2024-01-01
Supplement: d4cp02528h1.pdf [file d4cp02528h1.pdf]

1 **Supporting Information for:**

2

3

4

5 **Elucidating Gas-Surface Interactions Relevant to Atmospheric Particle**

6 **Growth using Combined Temperature Programmed Desorption and**

7 **Temperature-Dependent Uptake**

8

9

10

11 Kristen N. Johnson, Yixin Li,<sup>a</sup> Michael J. Ezell, Pascale S. J. Lakey, Manabu Shiraiwa and

12 Barbara J. Finlayson-Pitts

13 Department of Chemistry, University of California, Irvine, Irvine, CA 92697-2025

14 <sup>a</sup>Now at: Department of Atmospheric Sciences, Texas A&M University, College Station, TX

15 77843

16 Correspondence: Barbara J. Finlayson-Pitts ([bjfinlay@uci.edu](mailto:bjfinlay@uci.edu))

17

| 18 | <b>Contents</b>                                                                                | <b>Page</b> |
|----|------------------------------------------------------------------------------------------------|-------------|
| 19 | Detailed description of the apparatus.                                                         | 3           |
| 20 | Fig. S1. Schematic of the removable sample cup.                                                | 6           |
| 21 | Table S1. Temperature difference between the thermocouple mounted in the sample stage and      |             |
| 22 | that in the sample cup.                                                                        | 7           |
| 23 | Fig. S2. Schematic of the gas doser.                                                           | 8           |
| 24 | Fig. S3. Schematic of the north flange and components                                          | 9           |
| 25 | Table S2. Gas escape rates from the chamber and effective orifice diameters.                   | 10          |
| 26 | Fig. S4. Example of the deconvolution of the multilayer TPD peak.                              | 11          |
| 27 | Detailed description of the multilayer kinetic model.                                          | 12          |
| 28 | Fig. S5. A schematic of the multilayer kinetic model.                                          | 13          |
| 29 | Fig. S6. Simulation results for the surface concentrations of benzene.                         | 14          |
| 30 | Table S3. Kinetic model parameters.                                                            | 15          |
| 31 | Fig. S7. Example image of sample: silica powder on silicon wafer.                              | 16          |
| 32 | Fig. S8. Mass spectrometer calibration curves.                                                 | 17          |
| 33 | Fig. S9. Langmuir isotherm fit examples.                                                       | 18          |
| 34 | Fig. S10. Comparison of experimental data and kinetics model simulation for 1-chloropentane at |             |
| 35 | various initial concentrations.                                                                | 19          |
| 36 | Fig. S11. Comparison of experimental data and kinetics model simulation for methanol at        |             |
| 37 | various initial concentrations.                                                                | 20          |
| 38 | Fig. S12. Model results for benzene uptake to silica particles in the absence of diffusion     |             |
| 39 | limitations.                                                                                   | 21          |
| 40 | References                                                                                     | 22          |
| 41 |                                                                                                |             |

## 42 **Detailed Description of the Apparatus**

43           The main chamber consists of a stainless steel six way cross sealed by 6 in flanges. For  
44 reference, flanges that vacuum seal the cross are designated by the points of the compass (north,  
45 south, east, west) plus top and bottom. The measured chamber volume is 5260 cm<sup>3</sup> and the  
46 estimated interior surface area is 2360 cm<sup>2</sup>. The majority of stainless-steel parts and vacuum  
47 feedthroughs were obtained from Kurt J. Lesker Company (KJLC). Unless noted otherwise, all  
48 flanges are of the ConFlat UHV type and are sealed by compressed copper gaskets. Also, unless  
49 noted otherwise, machining for flanges and specialized parts was performed in house at the UCI  
50 machine shop, and all welds were formed from the vacuum side of flanges.

51           **Bottom Flange: Sample Stage and Temperature Control.** The bottom flange holds the  
52 removable sample cup and separates the cross from the cryogenic/heating parts of the apparatus.  
53 Temperature control of the sample is provided by balancing heating and cooling of a copper stub  
54 and rod in contact with the indium and the bottom of the sample cup. The sample cup sits inside a  
55 well whose bottom disc is brazed to the bottom rim of a thin walled (0.008 in) stainless steel  
56 cylinder. which is brazed at the top to a 6 in flange that is sealed to the six-way cross. This forms  
57 a pocket into which a removable sample cup fits for facile sample preparation and removal (Fig.  
58 S1). Temperature-control of the sample cup is provided from 100 K to 400 K. The lower end of  
59 the temperature range is limited by the heat transfer between the sample holder and the thin-walled  
60 stainless steel cylinder. The upper end of the temperature range is limited by the melting  
61 temperature of the indium foil. A thermocouple mounted in the center of the terminal stage is used  
62 to monitor the temperature during experiments. The temperature measured here agrees within  $\pm 1$   
63 K of that measured with a thermocouple mounted in the base of the sample cup (Table S1).

64 The temperature of the fixed sample stage and thus the bottom of the sample cup is  
65 controlled by cooling the lowest part of the copper rod assembly using liquid nitrogen and  
66 simultaneously heating by applying a current to a nichrome wire wound around the copper rod.  
67 Electrical power to the heating wire is supplied by a Eurotherm EFit power supply connected to a  
68 Eurotherm 3216 temperature controller. This is connected via an EIA 485 communications  
69 converter to a computer with iTools software v9 for data acquisition and monitoring. Temperature  
70 programming in the range of 100 K to 400 K is possible at a constant rate of up to  $0.5 \text{ K s}^{-1}$ . This  
71 upper heating rate is limited by the current limit of the temperature controller which was set to 10  
72 A for safety reasons. The temperature of a thermocouple mounted in the center of the fixed copper  
73 stub is within  $\pm 1 \text{ K}$  of that measured with a thermocouple mounted in the base of the sample cup  
74 in separate experiments (Table S1).

75 **Removable Sample Cup.** The removable sample cup (Fig. S1) consists of a copper disc  
76 that is gold-coated for inertness and attached to a thin-walled PEEK cylinder to minimize heat  
77 transfer from the bottom disc to the walls of the cup. The samples are placed on the bottom of the  
78 removable sample cup, so they are in thermal contact with the temperature-controlled sample  
79 stage. A second PEEK cylinder fits snugly inside the removable sample cup and can be pressed  
80 down with a threaded Teflon ring for improved thermal contact. Samples of potential interest  
81 include solids, e.g. powders, or flat surfaces such as silicon wafers that have been treated in  
82 different ways (e.g. derivatized with self-assembled monolayers) to present a well-defined surface  
83 composition to the incoming gas.

84 **Top Flange.** The top flange of the main chamber holds a linear feedthrough (Fig. 1a). For  
85 uptake measurements, a stainless-steel disc is attached to the linear feedthrough and serves as a  
86 cover for the sample holder. Alternatively, for TPD measurements, a gas doser is attached to the

87 linear feedthrough to introduce gases for even deposition of the gas across the sample surface (Fig.  
88 S2).

89 **North, South, East, and West Flanges.** The north flange (Fig. S3) serves as a mount for  
90 a magnetically driven rotatable feedthrough that allows for the selection of orifices of different  
91 diameters (0.5, 1, 2, 4, 8, 11 and 14 mm) that are machined around the periphery of a stainless-  
92 steel disk. The orificies are rotated in front of a fixed opening (17 mm) in a Teflon disk that leads  
93 to a quadrupole mass spectrometer (QMS, Extrel Core Mass Spectrometer) equipped with an  
94 electron impact ionization source. The south flange has a hinged easy access viewport to insert or  
95 remove the sample cup. It also provides a line-of-sight to view the selected orifice and ensure it is  
96 centered over the opening to the mass spectrometer. The west flange, located in the horizontal  
97 direction, has three 0.25 in stainless steel tubes welded to the flange to provide gas inlets. The east  
98 flange has two half nipples welded off center that connect to an ionization gauge and a pressure  
99 gauge to measure the pressure in the main cell during pump-down and in the presence of the flow  
100 of the reactant gases.

101 Due to limitations on the pumping speed from the tubing conductance connecting the north  
102 flange to the QMS, the effective orifice diameter is somewhat different from the nominal value.  
103 To account for this, the effective orifice diameters,  $D_{\text{eff}}$ , were calibrated using experimental  
104 measurements of the escape rate of selected gases. These are summarized in Table S2.

105

106

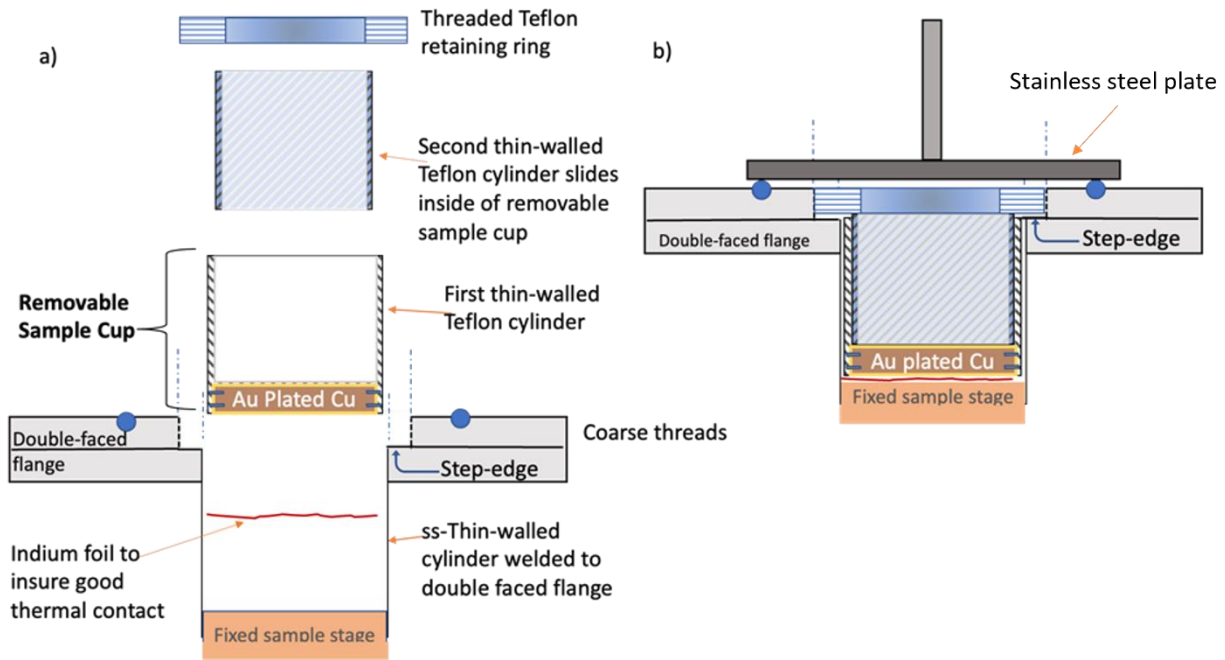

108

109

110

111

112

**Figure S1** a) Expanded view of the removable sample cup with associated parts; and b) assembled view with stainless-steel plate at the end of the linear feedthrough that rests on an o-ring to separate the sample from the main body of the 6-way cross.

113 **Table S1.** Temperatures (K) and temperature difference between the thermocouple mounted in  
 114 the sample stage and that in the sample cup.

| $T_{\text{stage}}$ | $T_{\text{cup}}$ | dT   |
|--------------------|------------------|------|
| 298.7              | 297.9            | 0.8  |
| 293.1              | 291.9            | 1.3  |
| 288.1              | 287.0            | 1.1  |
| 282.7              | 281.5            | 1.2  |
| 278.1              | 277.4            | 0.7  |
| 272.9              | 272.7            | 0.2  |
| 268.0              | 268.3            | -0.3 |
| 263.1              | 263.6            | -0.5 |
| 257.1              | 257.8            | -0.7 |
| 251.9              | 252.7            | -0.8 |
| 242.4              | 243.1            | -0.7 |
| 237.8              | 238.5            | -0.7 |
| 232.2              | 232.9            | -0.7 |
| 225.7              | 226.4            | -0.7 |
| 223.0              | 224.0            | -1.0 |
| 213.1              | 214.5            | -1.4 |
| 201.1              | 202.2            | -1.1 |
| 193.2              | 194.3            | -1.1 |
| 183.0              | 184.1            | -1.1 |
| 173.0              | 173.8            | -0.8 |
| 162.7              | 163.3            | -0.6 |
| 153.0              | 153.4            | -0.4 |
| 143.2              | 143.0            | 0.2  |
| 133.1              | 132.4            | 0.7  |
| 128.1              | 127.1            | 1.0  |
| 123.1              | 121.6            | 1.5  |
| 118.1              | 117.1            | 1.0  |
| 113.1              | 112.1            | 1.0  |
| 105.2              | 105              | 0.2  |

115  
 116

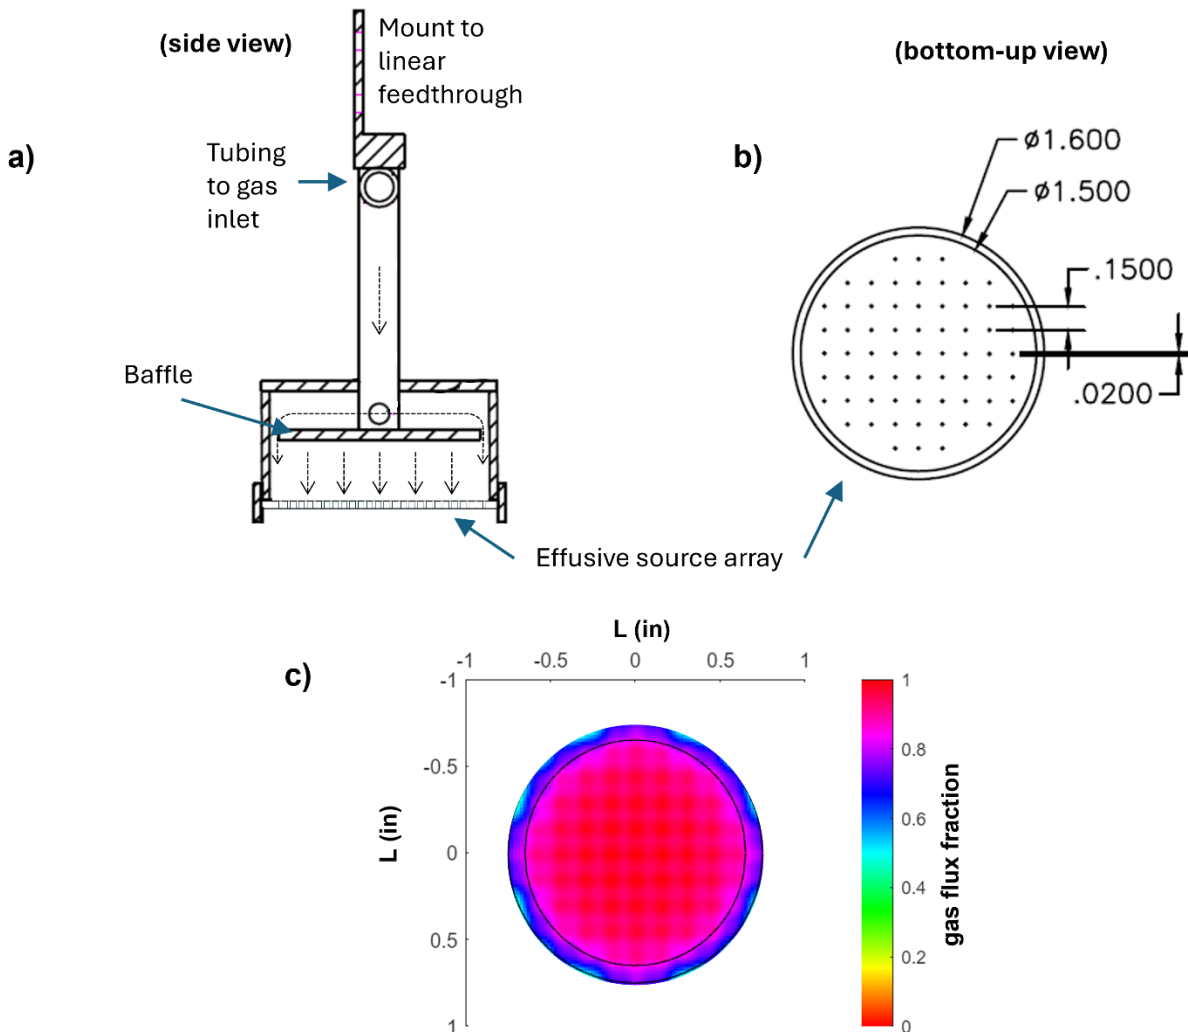

117  
 118 **Figure S2.** Schematic of the gas doser which uses an array of effusive orifices to deliver gases in  
 119 a uniform manner across the sample surface, a) side view, b) bottom-up view of orifice  
 120 placement, dimensions are in inches. Dashed arrows in a) denote the direction of the flow of  
 121 gases. The thickness of the effusive orifice plate is 0.005 in. c) Gas flux fraction across the array  
 122 of orifices. This design gives a flux gradient with 85% or better uniformity across an area  
 123 marked with the black circle which has an area of 1.32 in<sup>2</sup>. This is calculated from assuming a  
 124 flux per unit area of the sample  $G(\sigma) = \cos^4(\sigma)/\pi$  where  $\sigma$  is the angle to the source axis and the  
 125 distance between the doser and the sample is 0.15 in.<sup>1</sup>  
 126  
 127



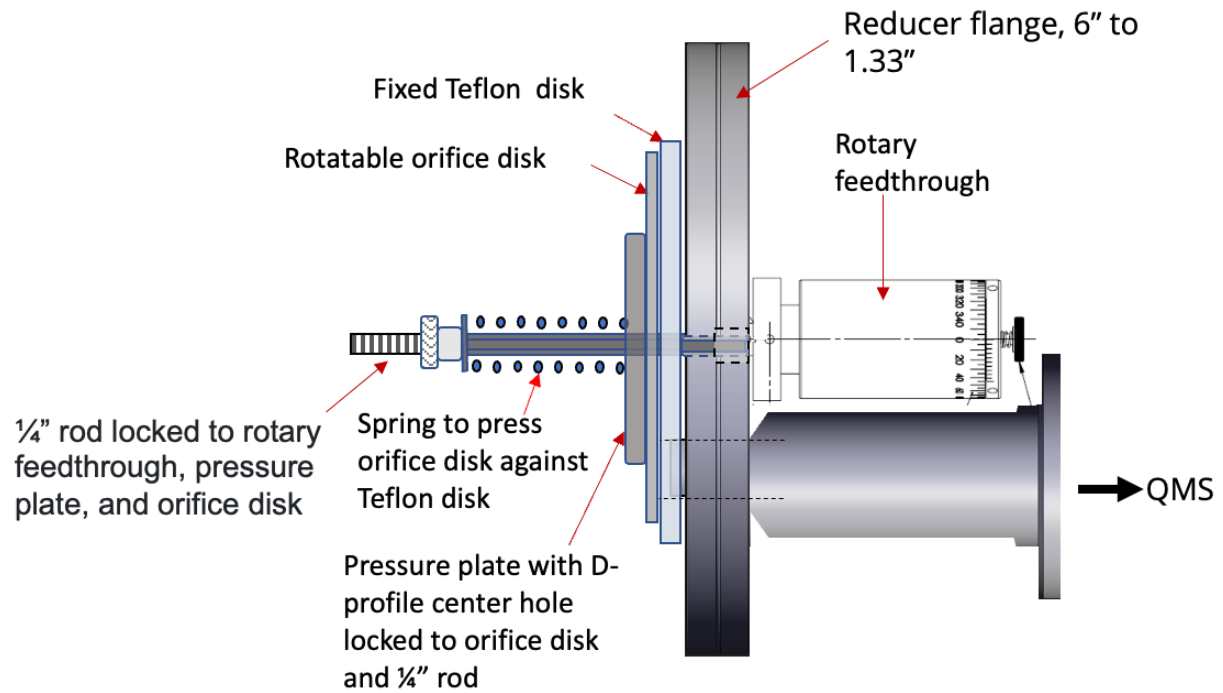

129  
 130  
 131  
 132

**Figure S3.** North Flange and components. Tension on the spring is adjusted to hold the rotatable orifice disk snugly against the fixed Teflon disk. QMS = quadrupole mass spectrometer.

133 **Table S2.** Gas escape rates and effective orifice diameters at 298 K.<sup>a</sup>

| D <sub>geometric</sub><br>(mm) | k <sub>esc, benzene</sub><br>(s <sup>-1</sup> ) | k <sub>esc, methanol</sub><br>(s <sup>-1</sup> ) | k <sub>esc, chloropentane</sub><br>(s <sup>-1</sup> ) | k'=k <sub>esc</sub> ·M <sup>0.5</sup><br>(s <sup>-1</sup> (g mol <sup>-1</sup> ) <sup>0.5</sup> ) <sup>b</sup> | D <sub>eff.</sub><br>(mm) <sup>c</sup> |
|--------------------------------|-------------------------------------------------|--------------------------------------------------|-------------------------------------------------------|----------------------------------------------------------------------------------------------------------------|----------------------------------------|
| 14                             | 0.560                                           | 0.700                                            | 0.462                                                 | 4.90 ± 0.23                                                                                                    | 7.2 ± 0.2                              |
| 11                             | 0.450                                           | 0.577                                            | 0.370                                                 | 4.01 ± 0.21                                                                                                    | 6.6 ± 0.2                              |
| 8                              | 0.360                                           | 0.398                                            | 0.277                                                 | 3.12 ± 0.10                                                                                                    | 5.8 ± 0.2                              |
| 4                              | 0.125                                           | 0.112                                            | 0.098                                                 | 0.96 ± 0.23                                                                                                    | 3.2 ± 0.4                              |
| 2                              | 0.037                                           | 0.037                                            | 0.028                                                 | 0.30 ± 0.06                                                                                                    | 1.8 ± 0.2                              |
| 1                              | 0.011                                           | 0.012                                            | 0.009                                                 | 0.09 ± 0.02                                                                                                    | 1.0 ± 0.1                              |
| 0.5                            | 0.007                                           | 0.007                                            | 0.005                                                 | 0.05 ± 0.01                                                                                                    | 0.7 ± 0.1                              |

134 <sup>a</sup> From the measurement of signal decay for benzene, 1-chloropentane, and methanol at 298K,  
 135 uncertainty is 1σ.

136 <sup>b</sup> M = molar mass of gas molecule in units of g mole<sup>-1</sup>, and k' is independent of mass.

137 <sup>c</sup> Explanation of D<sub>eff.</sub>

138 Defining  $k_{esc} = ZA_{orifice, effective} = Z\pi(D_{eff.}/2)^2$ , where A is the area of the orifice and Z is the  
 139 gas-chamber wall collision rate and is equal to:  $Z = \left(\frac{1}{4V}\right) \sqrt{\frac{8RT}{\pi M}}$  where V is the chamber  
 140 volume (5260 cm<sup>3</sup>), from there rearranging gives:  $D_{eff.} = 2\sqrt{\frac{k_{esc}}{\pi Z}}$

141

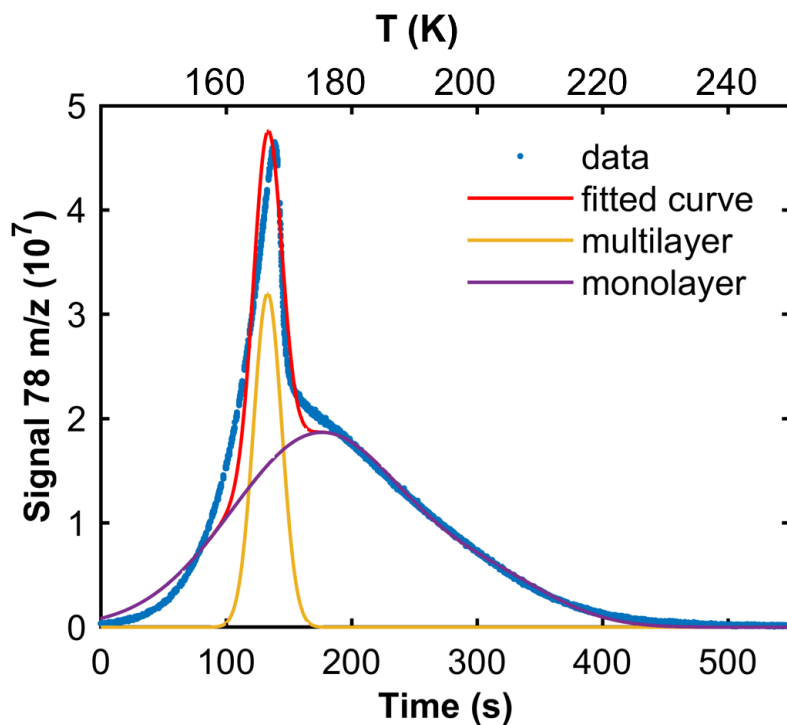

142  
 143 **Figure S4.** Example of the deconvolution of the multilayer and the monolayer desorption peaks  
 144 for benzene from Cabosil. The narrow yellow curve corresponds to the multilayer desorption for  
 145 benzene desorbing from a layer of benzene at 162 K. The broad curve corresponds to monolayer  
 146 desorption, benzene desorbing from the silicon oxide surface. The area under the monolayer  
 147 curve was used to determine the accessible surface area in all experiments based on the  
 148 calibrated mass spectrometer signal and the cross-sectional area of each molecule. The  
 149 temperature ramp rate was 0.2 K/s.

150

151 **Kinetic Model Description**

152

153 Figure S5 shows a schematic of the multilayer kinetic model used in this work. The model uses a  
 154 flux-based approach to describe vertical diffusion through the pores between silica particles and  
 155 reversible adsorption of compounds to the silica particle surfaces. Concentrations in the chamber  
 156 gas phase,  $[X]_g$  (molecules  $\text{cm}^{-3}$ ), in the first pore layer,  $[X]_{p,1}$ , (molecules  $\text{cm}^{-3}$ ), in the middle pore  
 157 layers,  $[X]_{p,j}$ , (molecules  $\text{cm}^{-3}$ ), in the last pore layer,  $[X]_{p,n}$ , (molecules  $\text{cm}^{-3}$ ), and adsorbed to the  
 158 silica in each layer,  $[X]_{\text{ads},j}$ , (molecules  $\text{cm}^{-2}$ ), are calculated as a function of time by solving a  
 159 series of differential equations as shown below:

$$\frac{d[X]_g}{dt} = k_{\text{in}}[X]_{g,0} - k_{\text{out}}[X]_g + (J_{\text{diff},p1,g} - J_{\text{diff},g,p1}) \frac{F_{\text{pores}}A_{\text{sil}}}{V} \quad (\text{E1})$$

$$\begin{aligned} \frac{d[X]_{p,1}}{dt} = & (J_{\text{diff},g,p1} - J_{\text{diff},p1,g}) \frac{1}{\delta_{\text{layer}}} + (J_{\text{diff},p2,p1} - J_{\text{diff},p1,p2}) \frac{1}{\delta_{\text{layer}}} + (J_{\text{des},1} \\ & - J_{\text{ads},1}) \frac{S_{\text{sil}}}{A_{\text{sil}}\delta_{\text{sil}}F_{\text{pores}}} \end{aligned} \quad (\text{E2})$$

$$\begin{aligned} \frac{d[X]_{p,j}}{dt} = & (J_{\text{diff},p,j-1,pj} - J_{\text{diff},pj,pj-1}) \frac{1}{\delta_{\text{layer}}} + (J_{\text{diff},p,j+1,pj} - J_{\text{diff},pj,pj+1}) \frac{1}{\delta_{\text{layer}}} + (J_{\text{des},j} \\ & - J_{\text{ads},j}) \frac{S_{\text{sil}}}{A_{\text{sil}}\delta_{\text{sil}}F_{\text{pores}}} \end{aligned} \quad (\text{E3})$$

$$\frac{d[X]_{p,n}}{dt} = (J_{\text{diff},p,n-1,pn} - J_{\text{diff},pn,pn-1}) \frac{1}{\delta_{\text{layer}}} + (J_{\text{des},n} - J_{\text{ads},n}) \frac{S_{\text{sil}}}{A_{\text{sil}}\delta_{\text{sil}}F_{\text{pores}}} \quad (\text{E4})$$

$$\frac{d[X]_{\text{ads},j}}{dt} = J_{\text{ads},j} - J_{\text{des},j} \quad (\text{E5})$$

160 where  $k_{\text{in}}$  ( $\text{s}^{-1}$ ) and  $k_{\text{out}}$  ( $\text{s}^{-1}$ ) are the first-order rates of molecules entering the chamber and being  
 161 removed from the chamber, respectively.  $[X]_{g,0}$  (molecules  $\text{cm}^{-3}$ ) is the gas-phase concentration  
 162 flowing into the chamber,  $F_{\text{pores}}$  is the volume fraction of pores in the deposited silica,  $A_{\text{sil}}$  ( $\text{cm}^2$ ) is  
 163 the geometric surface area of the spot that the particles form,  $V$  ( $\text{cm}^3$ ) is the volume of the chamber,  
 164  $\delta_{\text{layer}}$  (cm) is the thickness of a layer in the model,  $S_{\text{sil}}$  ( $\text{cm}^2$ ) is the total surface area of the silica  
 165 particles and  $\delta_{\text{sil}}$  (cm) is the total thickness of the silica particles.  $J_{\text{ads},j}$  ( $\text{cm}^{-2} \text{s}^{-1}$ ) and  $J_{\text{des},j}$  ( $\text{cm}^{-2} \text{s}^{-1}$ )  
 166 are the adsorption and desorption fluxes to and from the silica surface in layer  $j$ , respectively.  
 167  $J_{\text{diff},g,p1}$  ( $\text{cm}^{-2} \text{s}^{-1}$ ) and  $J_{\text{diff},p1,g}$  ( $\text{cm}^{-2} \text{s}^{-1}$ ) are the diffusion fluxes from the gas phase to the first layer  
 168 of pores and from the first layer of pores to the gas phase, respectively.  $J_{\text{diff},pj,pj+1}$  ( $\text{cm}^{-2} \text{s}^{-1}$ ) and  
 169  $J_{\text{diff},pj,pj-1}$  ( $\text{cm}^{-2} \text{s}^{-1}$ ) are the diffusion fluxes from layer  $j$  to layers  $j+1$  and  $j-1$ , respectively.

170 Adsorption and desorption fluxes in the model are based on equations from the kinetic double-  
 171 layer model of aerosol surface chemistry and gas-particle interactions (K2-SURF)<sup>2</sup> and are  
 172 consistent with Langmuir's theory of adsorption. Diffusion in the pores between the particles is  
 173 assumed to follow Fick's first law of diffusion. For simplicity, the same diffusion coefficient is  
 174 assumed between each layer in the model and the total silica particle surface area is split evenly  
 175 between the model layers. The number of model layers ( $n$ ) has been increased until convergence  
 176 in the results is obtained. A list of parameters used in the model are presented in Table S2 alongside  
 177 explanations of the values. The desorption rate of molecules from the silica surface and the  
 178 diffusion coefficient through the gas-phase pores were the only unknown parameters and were  
 179 varied until the model could replicate the experimental measurements. Note that the pressure was  
 180 reset in the model each time the lid was closed, but drifting signals or pressures that occurred while  
 181 the lid was open have not been treated.

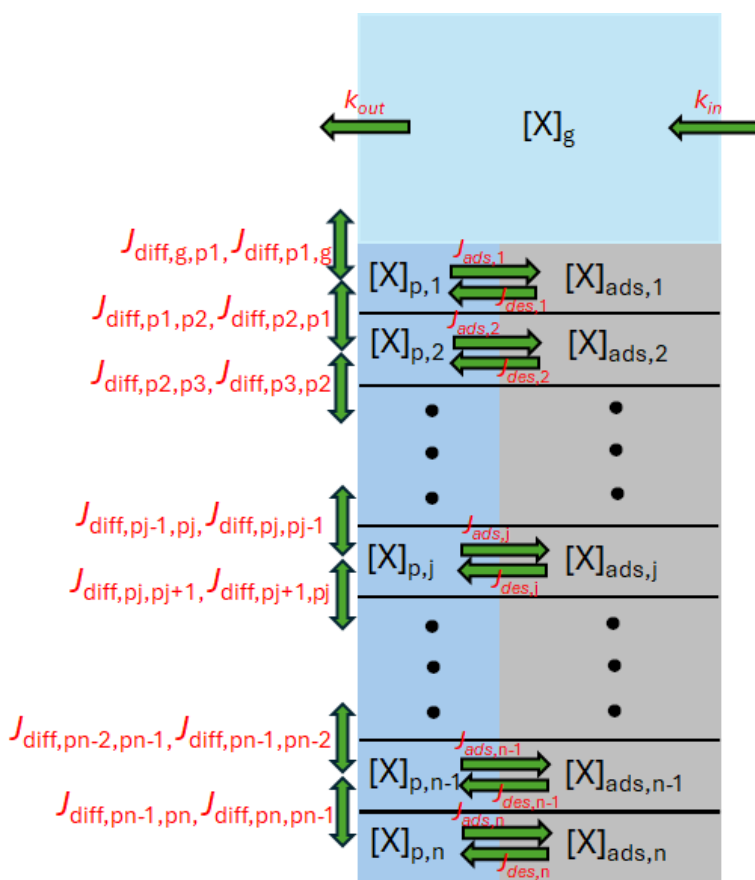

182  
 183 **Figure S5:** A schematic of the multilayer kinetic model.

184  
 185

186

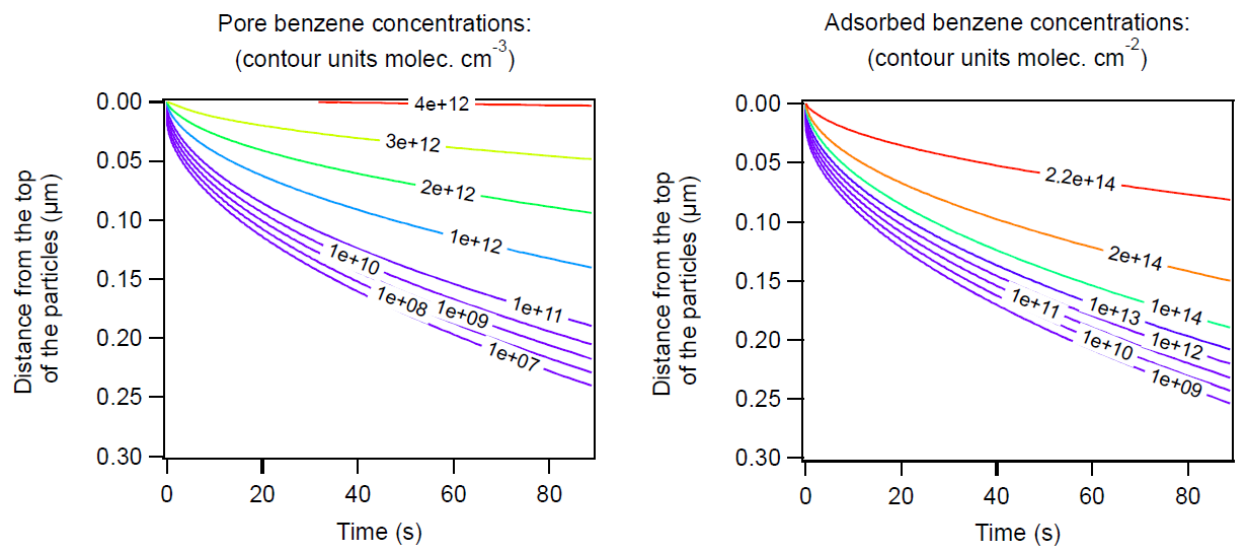

187

188 **Figure S6.** Results of multilayer model simulations for initial benzene concentration  $7.3 \times 10^{-5}$   
189 Torr ( $4.2 \times 10^{12}$  molecules  $\text{cm}^{-3}$ ). Showing gas phase benzene concentrations in the pores (left)  
190 and surface concentrations adsorbed on the silica particles (right) as a function of depth within  
191 the bed of particles.

192

193 **Table S3.** Parameters used in the kinetic model.

| Parameter      | Description                                                                    | Parameter values                      |                                        |                                        | Additional information                                                                         |
|----------------|--------------------------------------------------------------------------------|---------------------------------------|----------------------------------------|----------------------------------------|------------------------------------------------------------------------------------------------|
|                |                                                                                | Benzene                               | Methanol                               | Chloropentane                          |                                                                                                |
| $k_{out}$      | First order removal rate of molecules from the chamber.                        | 0.589 s <sup>-1</sup>                 | 0.7 s <sup>-1</sup>                    | 0.46 s <sup>-1</sup>                   | Experimental value ( $k_{esc}$ )                                                               |
| $k_{in}$       | First order rate of molecules entering the chamber.                            | 0.589 s <sup>-1</sup>                 | 0.7 s <sup>-1</sup>                    | 0.46 s <sup>-1</sup>                   | Same as $k_{out}$                                                                              |
| $T$            | Temperature                                                                    | 170 K                                 | 170 K                                  | 170 K                                  | Experimental value                                                                             |
| $\sigma$       | Surface area of 1 molecule                                                     | $4.3 \times 10^{-15}$ cm <sup>2</sup> | $2.1 \times 10^{-15}$ cm <sup>2</sup>  | $4.0 \times 10^{-15}$ cm <sup>2</sup>  | Literature value <sup>3</sup>                                                                  |
| $A_{sil}$      | Geometric surface area of the spot that the particles form.                    | 3.14 cm <sup>2</sup>                  | 7.85 cm <sup>2</sup>                   | 7.85 cm <sup>2</sup>                   | Experimental value based on mass of particles used                                             |
| $S_{sil}$      | Total surface area of the silica particles                                     | 2000 cm <sup>2</sup>                  | 5000 cm <sup>2</sup>                   | 5000 cm <sup>2</sup>                   | Experimental value (determined from N <sub>2</sub> adsorption) based on mass of particles used |
| $V$            | Volume of the chamber                                                          | 5260 cm <sup>3</sup>                  | 5260 cm <sup>3</sup>                   | 5260 cm <sup>3</sup>                   | Experimental value                                                                             |
| $\delta_{sil}$ | Thickness of the deposited particles                                           | 1.77 μm                               | 1.77 μm                                | 1.77 μm                                | A hexagonal closed packed packing structure is assumed.                                        |
| $F_{sil}$      | Volume fraction of silica in the layers of deposited silica particles.         | 0.74                                  | 0.74                                   | 0.74                                   |                                                                                                |
| $F_{pores}$    | Volume fraction of gas (or pores) in the layers of deposited silica particles. | 0.26                                  | 0.26                                   | 0.26                                   |                                                                                                |
| $\alpha_{s,0}$ | Surface accommodation coefficient on an adsorbate free silica surface          | 1                                     | 1                                      | 1                                      | Typical value                                                                                  |
| $k_d$          | Desorption rate coefficient of molecules from the silica surface.              | 3 s <sup>-1</sup>                     | 0.4 s <sup>-1</sup>                    | 0.1 s <sup>-1</sup>                    | Fitting value                                                                                  |
| $D_p$          | Diffusion coefficient through the gas-phase pores.                             | 0.001 cm <sup>2</sup> s <sup>-1</sup> | 0.0012 cm <sup>2</sup> s <sup>-1</sup> | 0.0015 cm <sup>2</sup> s <sup>-1</sup> | Fitting value                                                                                  |

194

195

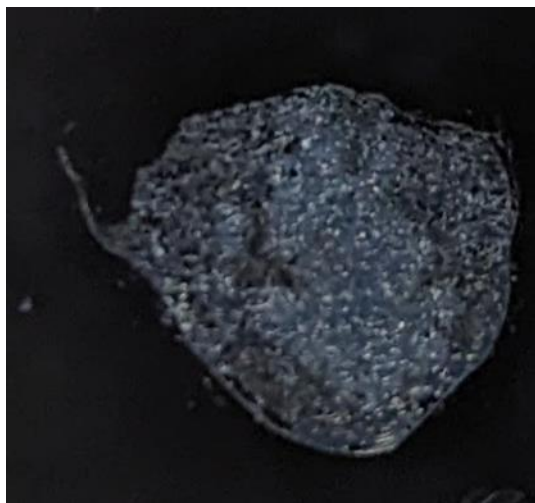

196

197 **Figure S7.** Top-down view photo of 1 mg of Cabosil deposited from an aqueous 10 mg/ml  
198 suspension onto an Ar plasma cleaned silicon wafer. Particles form a cylindrical bed with  
199 approximately 2 cm diameter and 2  $\mu\text{m}$  depth assuming uniform hexagonal close packing of 100  
200 nm particles.

201



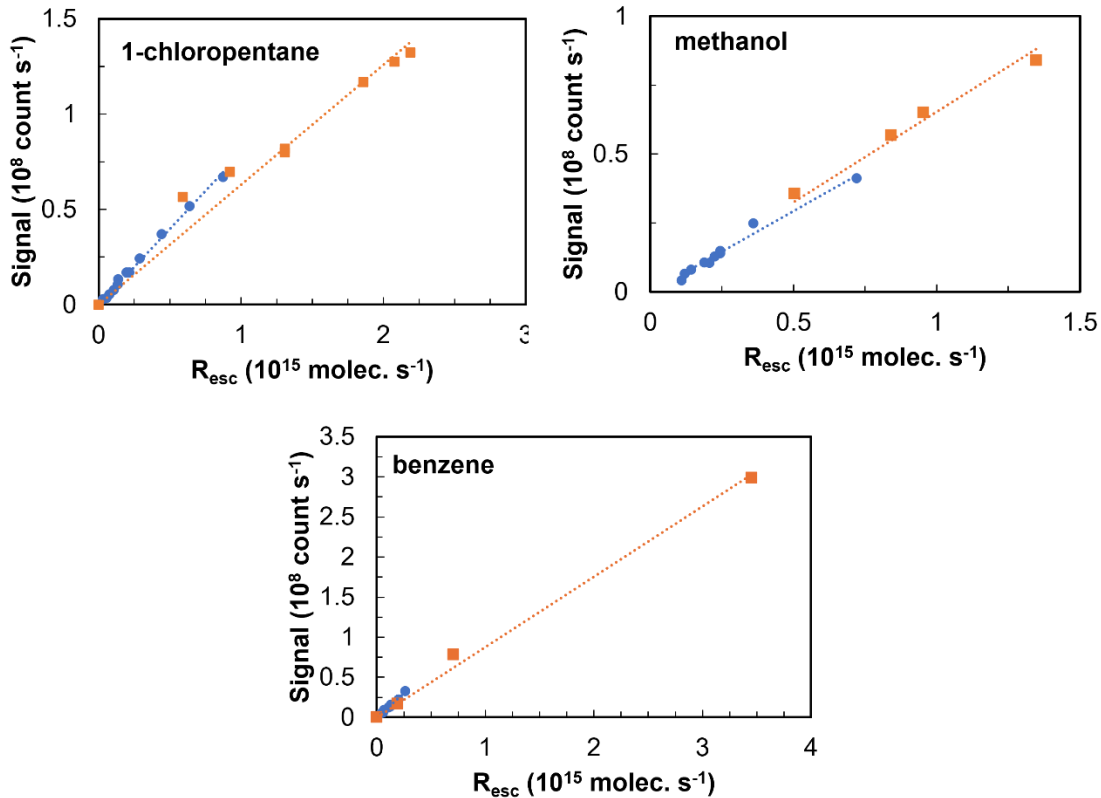

202

203 **Figure S8.** Calibration curves used for the uptake experiments for all adsorbates. The data for  
 204 the 2 mm (blue circles) and for the 14 mm (orange squares) orifices are shown. Linear regression  
 205 lines of best fit (dotted lines) are also shown. The rate of escape in molecules  $\text{s}^{-1}$  is calculated by  
 206  $R_{\text{esc}} = k_{\text{esc}} N$  where  $k_{\text{esc}}$  is experimentally measured (Table S2) from the signal decay and  $N$  is  
 207 number of molecules in the chamber calculated from the chamber pressure using the ideal gas  
 208 law.

209

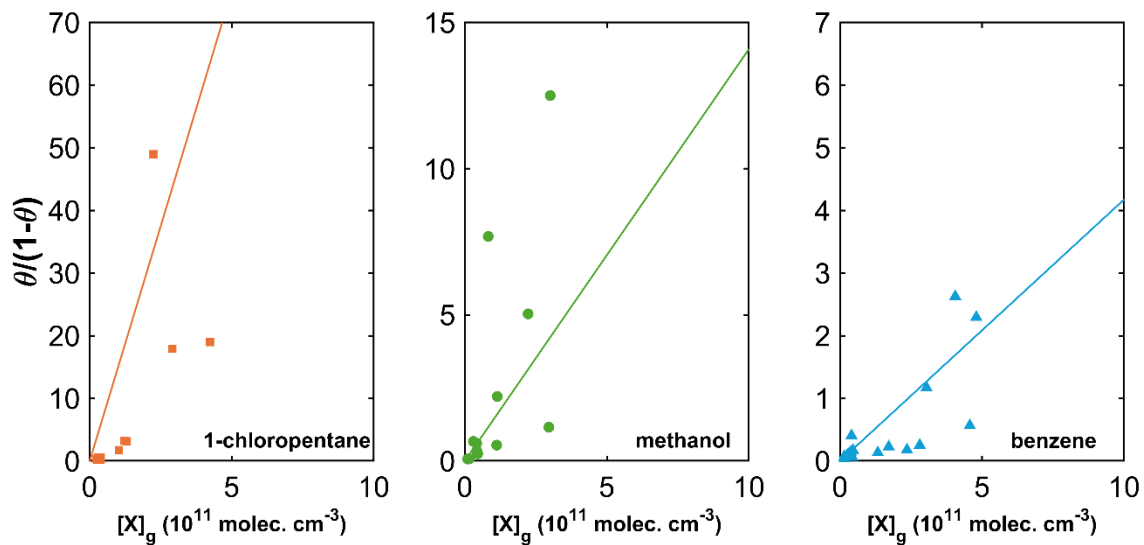

210

211 **Fig. S9.** Langmuir isotherm and line of best fit for 1-chloropentane, methanol, and benzene. The  
 212 slope of the linear curve plotted here is equal to  $K$  and this fitted value was used in Eq. 2 to plot  
 213 the solid curve in Fig. 4.

214

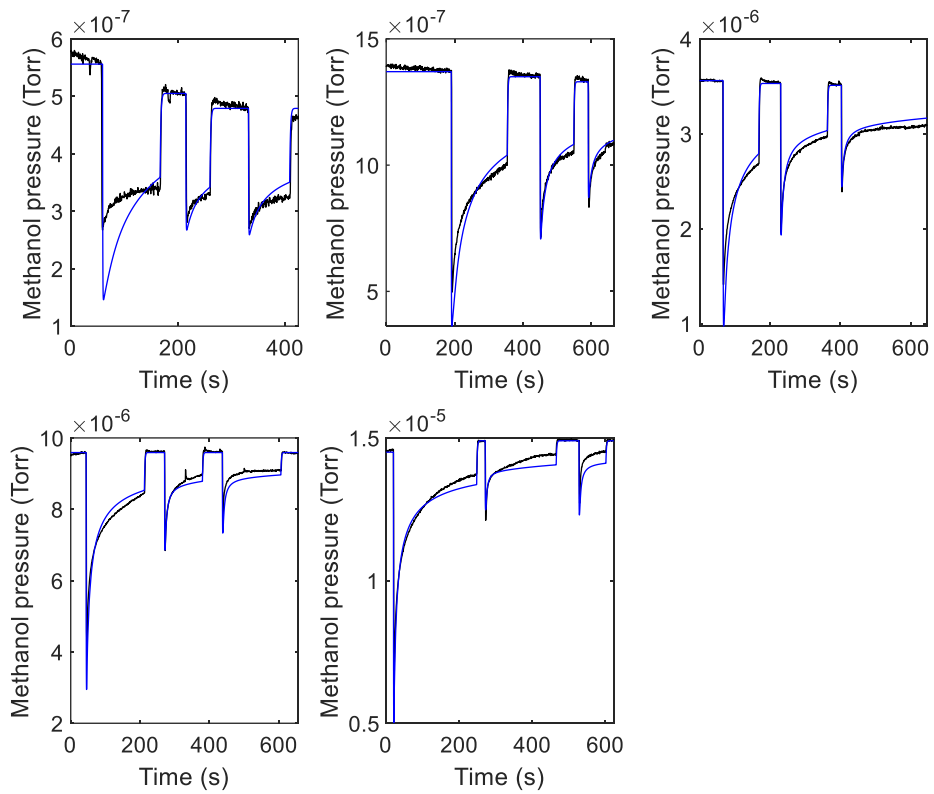

215  
 216 **Figure S10:** Measurements (black) and kinetic model results (blue) for the uptake of methanol  
 217 onto silica particles for different initial methanol pressures.  
 218

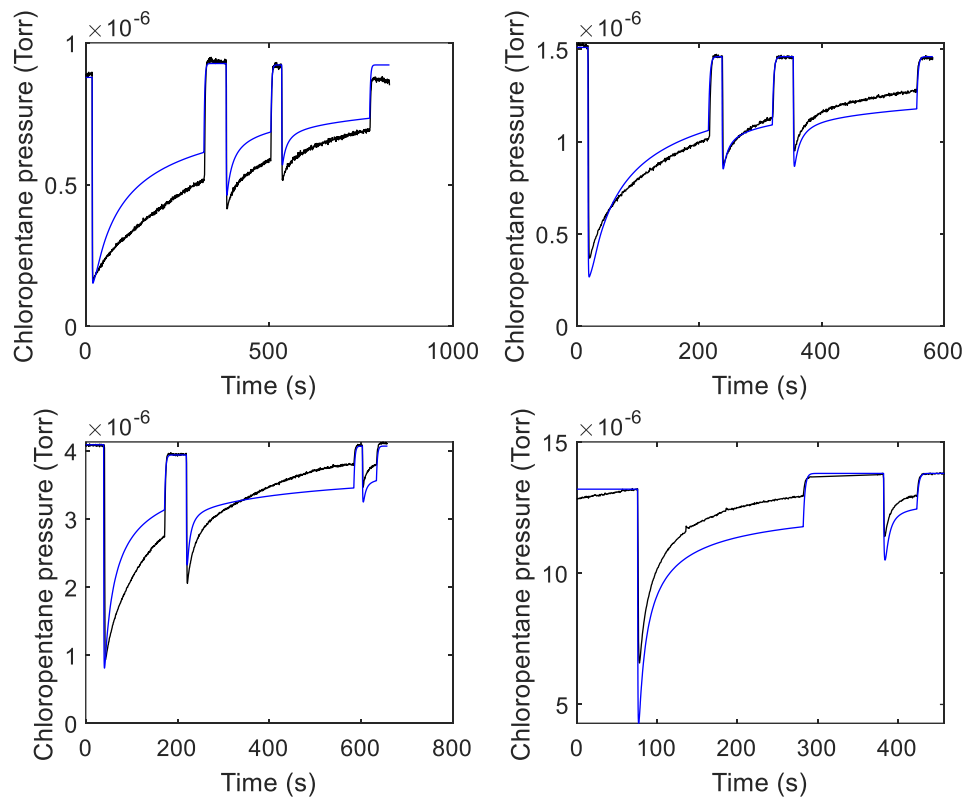

219  
 220  
 221  
 222

**Figure S11:** Measurements (black) and kinetic model (blue) results for the uptake of chloropentane onto silica particles for different initial chloropentane pressures.

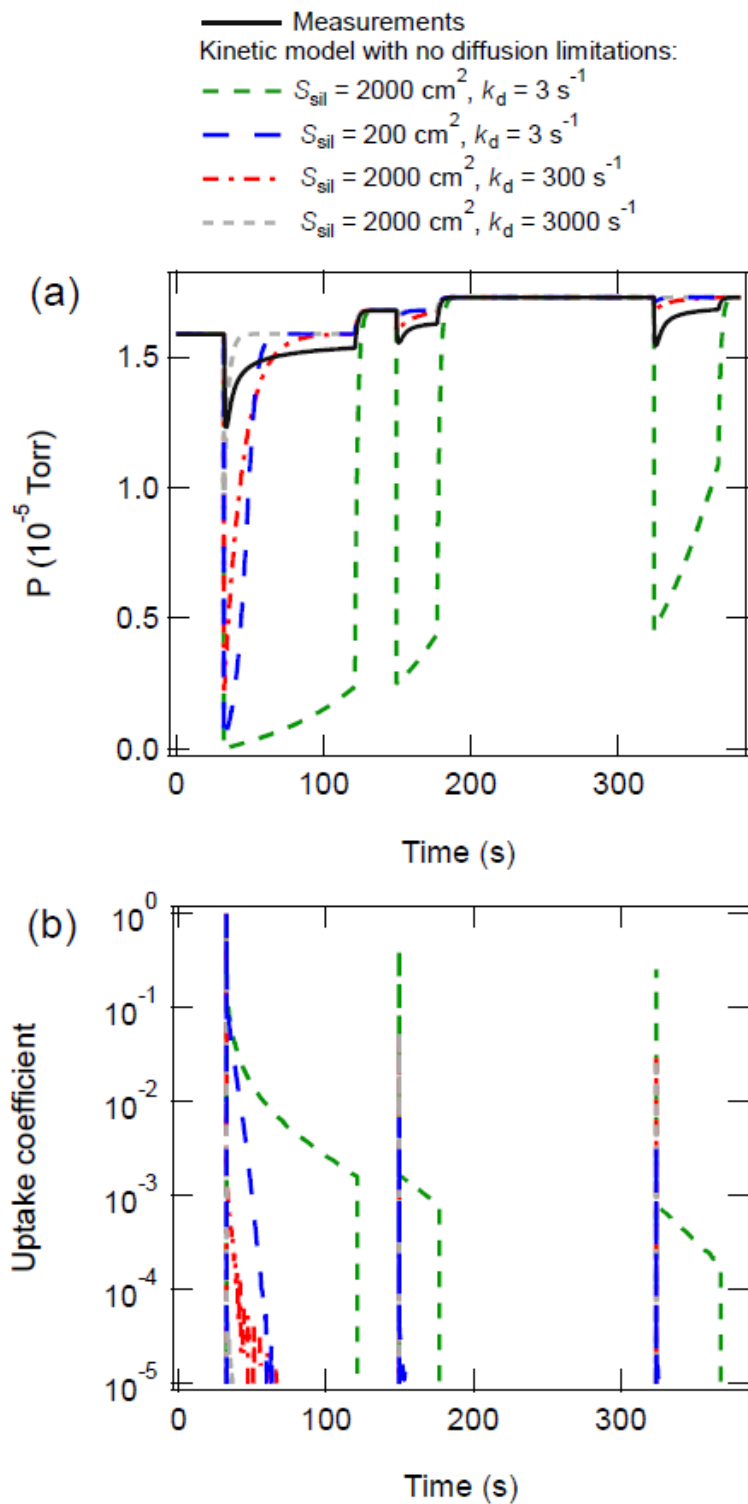

223  
 224 **Figure S12:** Model results for (a) benzene uptake to silica particles in the absence of diffusion  
 225 limitations and (b) the corresponding uptake coefficients.  
 226

227 **References**

228

- 229 1. Kuhl, D. E.; Tobin, R. G., On the Design of Capillary and Effusive Gas Dosers for  
230 Surface Science. *Review of Scientific Instruments* **1995**, *66*, 3016-3020.
- 231 2. M. Shiraiwa, R. M. Garland and U. Pöschl, Kinetic double-layer model of aerosol surface  
232 chemistry and gas-particle interactions (K2-SURF): Degradation of polycyclic aromatic  
233 hydrocarbons exposed to O<sub>3</sub>, NO<sub>2</sub>, H<sub>2</sub>O, OH and NO<sub>3</sub>, *Atmos. Chem. Phys.*, 2009, **9**, 9571-9586.
- 234 3. Sing, K. S. W. 7 - Assessment of Surface Area by Gas Adsorption. In *Adsorption by*  
235 *Powders and Porous Solids (Second Edition)*; Rouquerol, F., Rouquerol, J., Sing, K. S. W.,  
236 Llewellyn, P., Maurin, G., Eds.; Academic Press: Oxford, 2014; pp 237–268.
